# Supplementary material for: Early brainstem [18F]THK5351 uptake is linked to cortical hyperexcitability in healthy aging
Source: JCI journal article supplement (doi:10.1172/jci.insight.142514), 2020-12-08
Supplement: sd1 [file 1]

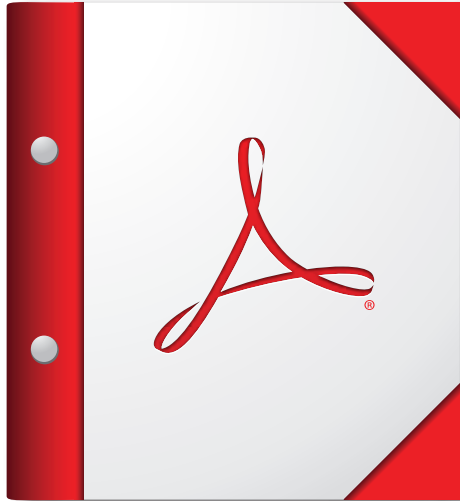

**For the best experience, open this PDF portfolio in  
Acrobat X or Adobe Reader X, or later.**

[Get Adobe Reader Now!](#)
